# Supplementary material for: Muc5b overexpression causes mucociliary dysfunction and enhances lung fibrosis in mice
Source: PubMed Central journal article supplement (PMC6299094; doi:10.1038/s41467-018-07768-9), 2018-12-18
Supplement: 41467_2018_7768_MOESM1_ESM.pdf [file 41467_2018_7768_MOESM1_ESM.pdf]

# **Muc5b overexpression causes mucociliary dysfunction and enhances lung fibrosis in mice**

Hancock et al.

## **Supplementary Information**

Supplementary Figures 1-8

Supplementary Table 1

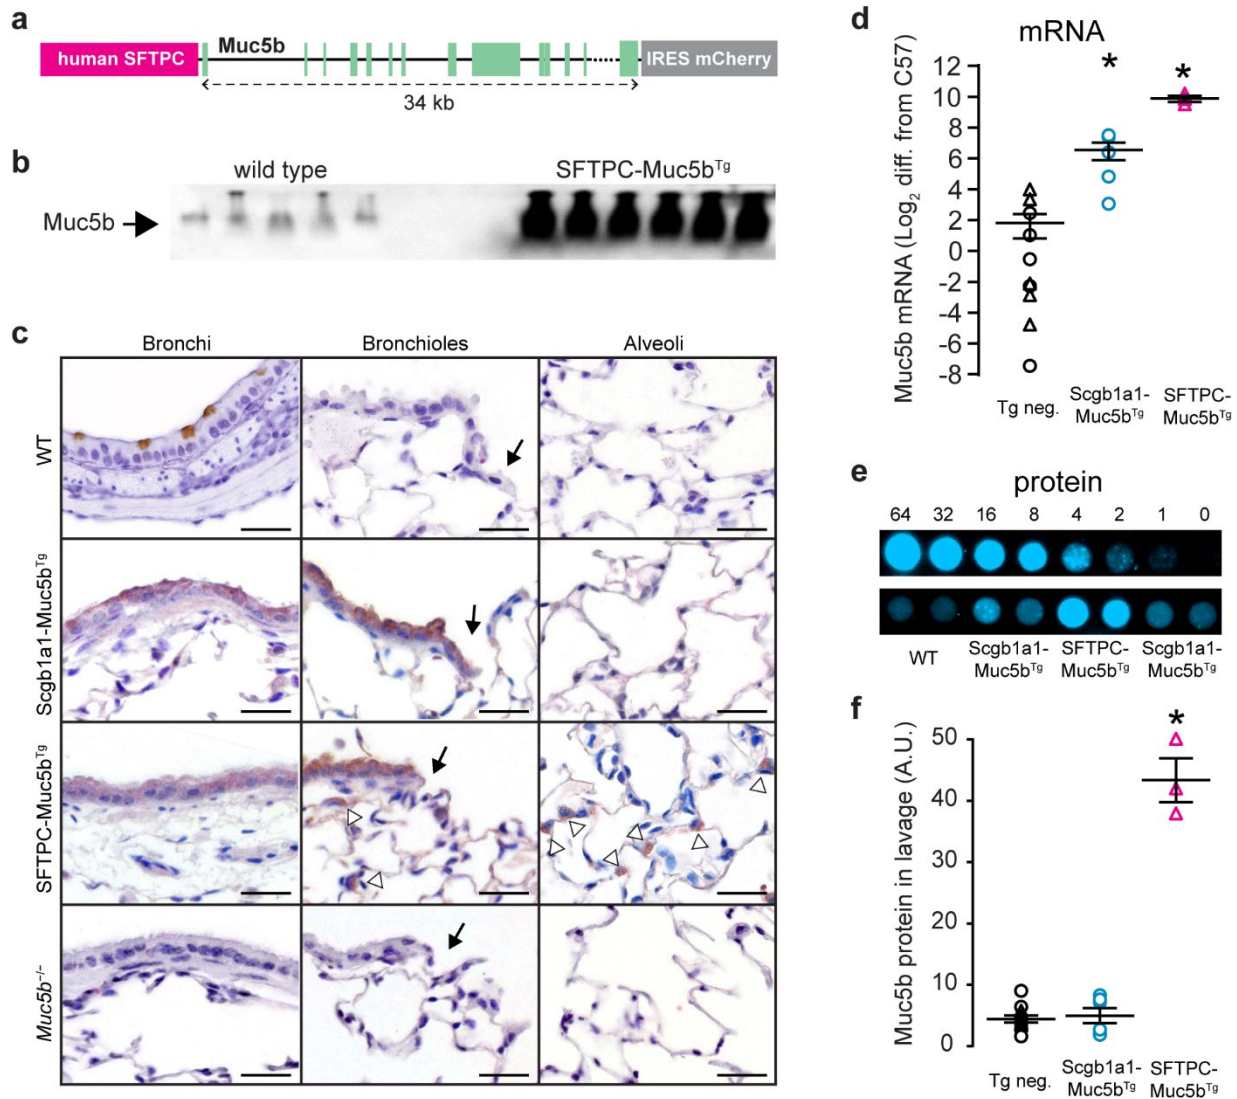

**Supplementary Figure 1. Transgenic models for Muc5b overproduction.** (a) A full length (34 kb) fragment of the mouse *Muc5b* gene was inserted into a transgenic targeting vector containing 3.7 kb of the human surfactant protein C (SFTPC) promoter and an internal ribosomal entry sequence (IRES)-monomeric Cherry (mCherry) red fluorescent protein. (b) Mice possessing this SFTPC-Muc5b transgene (SFTPC-Muc5b<sup>Tg</sup> mice), overproduce Muc5b in the lungs. Western blot analysis of Muc5b extracted from lysates of SFTPC-Muc5b<sup>Tg</sup> mice and wild type littermate control. (c-f) Comparison of Muc5b expression and localization in Muc5b mutant animals. (c) Immunohistochemistry performed using rabbit-anti-Muc5b antisera (1:20,000) shows Muc5b localization to bronchial airways in wt mice, with extension of Muc5b to distal bronchioles in Scgb1a1-Muc5b<sup>Tg</sup> mice, and to distal bronchioles and type 2 alveolar epithelia in SFTPC-Muc5b<sup>Tg</sup> mice. Muc5b immunolabeling was absent in *Muc5b*<sup>-/-</sup> lung tissues. Arrows, bronchoalveolar duct junctions. Arrowheads, Muc5b expressing type 2 cells. Scale bar, 50 μm. (d) Compared to wt (n = 12), Muc5b mRNA levels in lung lysates were 50-fold higher in Scgb1a1-Muc5b<sup>Tg</sup> (n = 6) mice and 150-fold higher in SFTPC-Muc5b<sup>Tg</sup> mice (n = 3). (e,f) Muc5b levels were assessed in lung lavage fluid by dot blot ELISA (e). Compared to wt (n = 6) levels in lung lavage fluid (f), Muc5b protein levels were not significantly increased in Scgb1a1-Muc5b<sup>Tg</sup> mice (n = 6), and were >40-fold higher in SFTPC-Muc5b<sup>Tg</sup> mice (n = 3). In e,f, circles depict Scgb1a1-Muc5b<sup>Tg</sup> mice and their wild type littermates, and triangles depict SFTPC-Muc5b<sup>Tg</sup> mice and their wild type littermates.

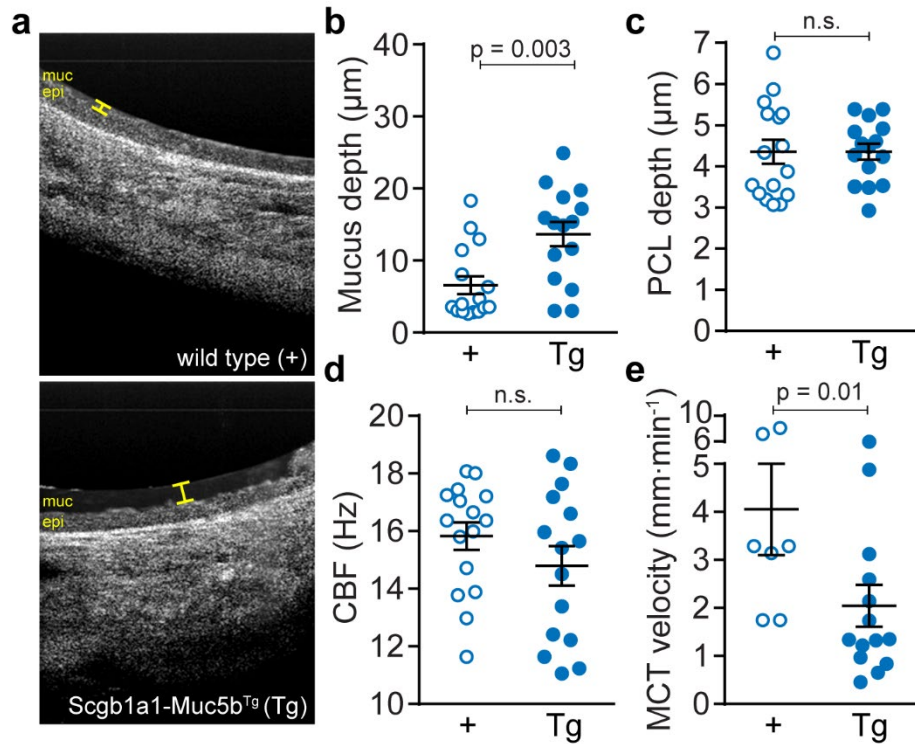

**Supplementary Figure 2. Muc5b overexpression in Scgb1a1-Muc5b<sup>Tg</sup> mice is associated with impaired mucociliary transport.** (a) Representative excised Scgb1a1-Muc5b<sup>Tg</sup> mice tracheas were assessed by  $\mu\text{OCT}$  in comparison to tracheas of wild type (+) littermate controls. (b-e). Quantitative metrics from image analysis reveal increased mucus layer depth (b) without significant alteration of periciliary layer (PCL) depth (c) in Tg mice compared to + controls. Functional analysis demonstrated no significant effect on ciliary beat frequency (d) and diminished mucociliary transport rates (e) in Muc5b-overexpressing mice. Data are means  $\pm$  sem analyzed by Mann-Whitney test.

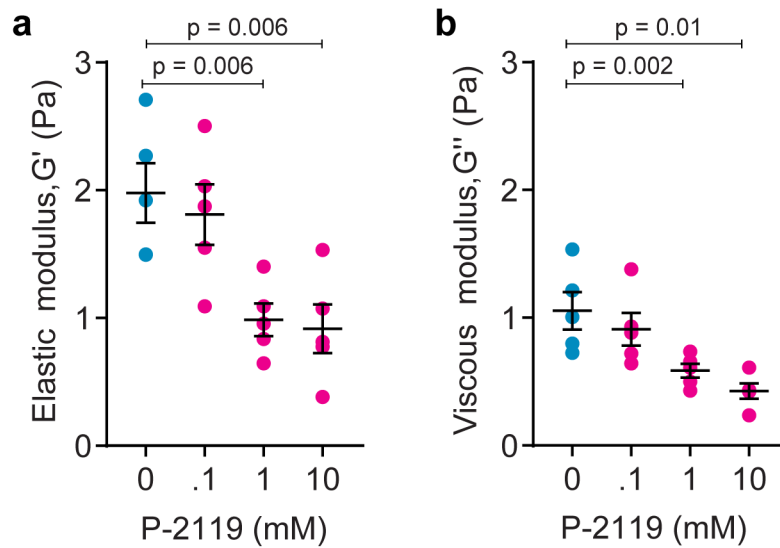

**Supplementary Figure 3. Mucolytic treatment reduces elastic and viscous properties of mucus.**

The solid and liquid biophysical properties of viscoelastic mucus were assessed by cone-plate rheometry to determine elastic storage ( $G'$ ) and viscous loss ( $G''$ ) moduli. **(a,b)** In 5% mucus, the storage modulus was 3-fold greater than the viscous modulus at baseline (0 mM P-2119). With 10 mM P-2119 both elastic modulus **(a)** and viscous modulus **(b)** decreased significantly. ‘\*’,  $p < 0.05$  between 0 and 10 mM treated samples by t-test.

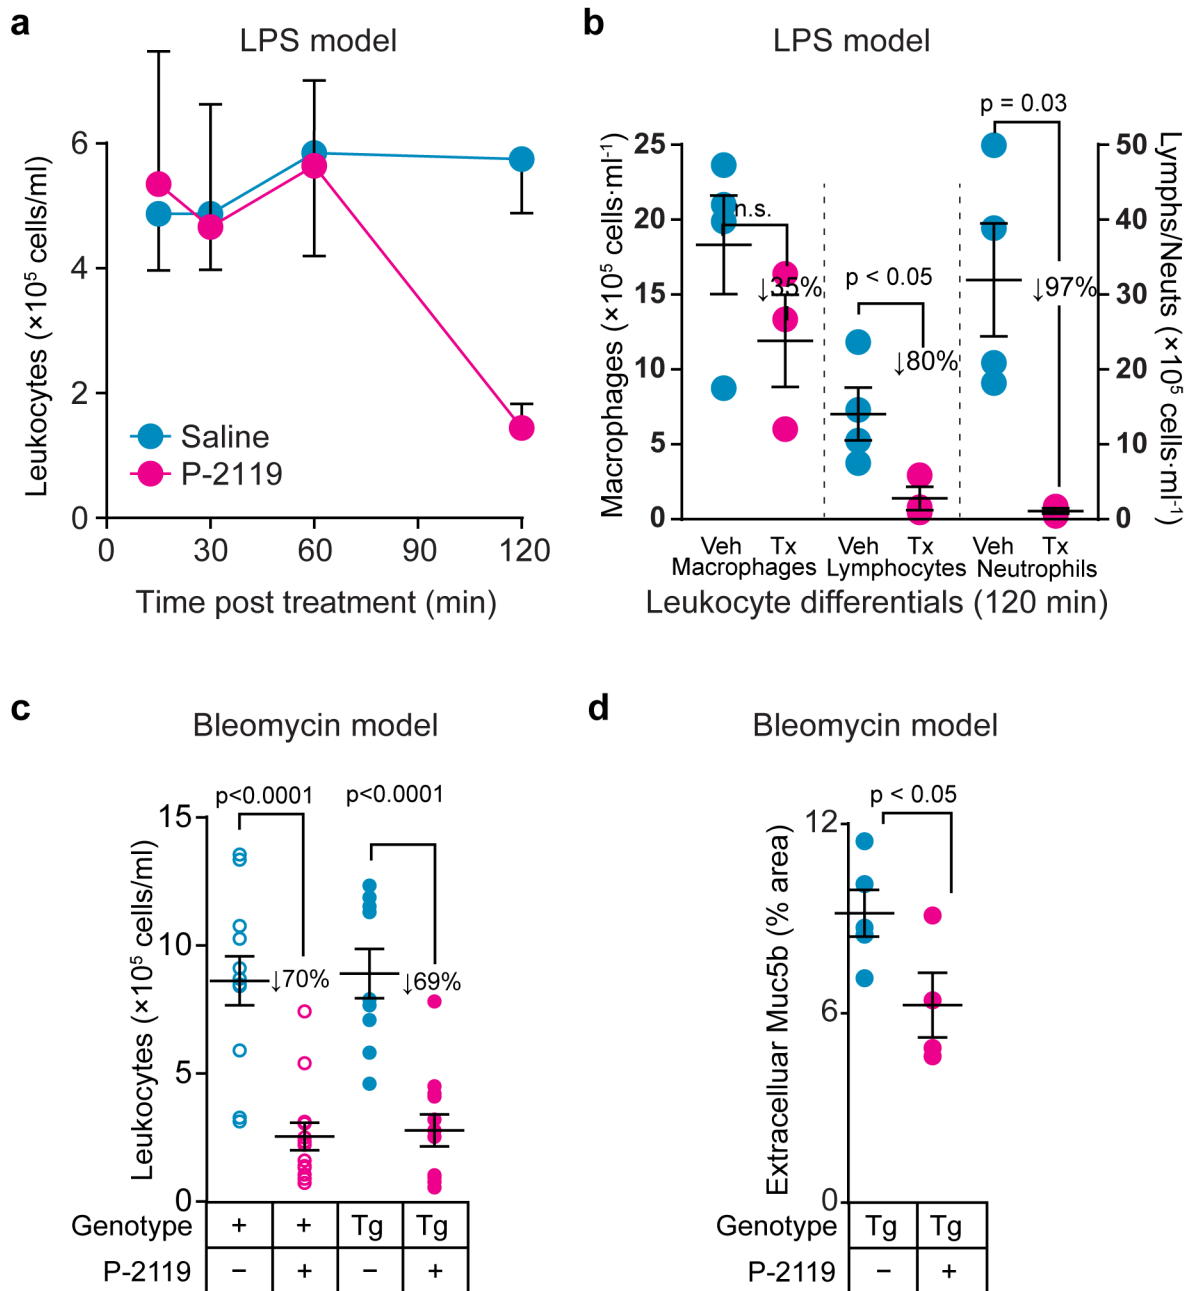

**Supplementary Figure 4. Acute endogenous clearance of inflammatory cell populations in the lungs of P-2119 treated mice.** (a,b) Wild type C57BL/6J mice were challenged IT with 20  $\mu$ g of LPS (*E. coli* 055:B5) was administered in a 50  $\mu$ l volume of saline. Mice were then treated with P-2119 or vehicle 48 h post LPS challenge. (a) Timecourse of leukocyte elimination in lung lavage fluid in LPS challenged mice following treatment with P-2119 aerosol (red) or saline (blue). (b) Leukocyte differentials in LPS challenged mice 120 min post treatment with P-2119. Lymphocyte and neutrophil numbers decreased significantly. (c,d) In bleomycin challenged SFTPC-Muc5b<sup>Tg</sup> mice, total cells in lung lavage fluid (c) and extracellular Muc5b in distal airspaces (d) were significantly lower in P-2119 treated mice compared to vehicle treated animals. Data are means  $\pm$  sem (n=3-4 mice per timepoint and treatment group). Statistical significance was determined using a t test (with Welch's correction for neutrophil numbers).

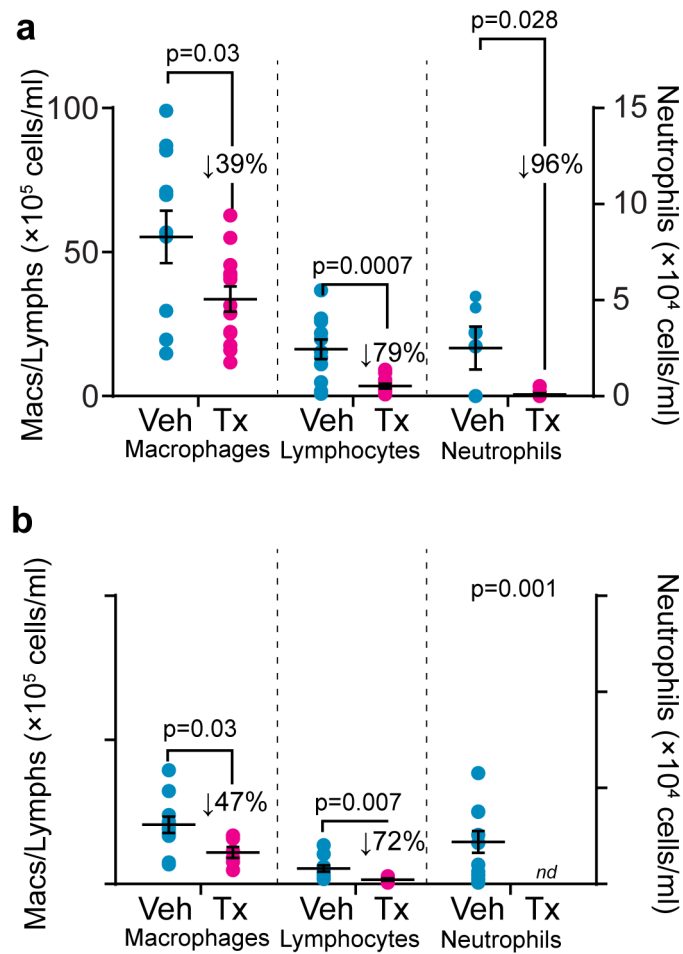

**Supplementary Figure 5. P-2119 treatment reduces persistent lung injury.** (a-c) Inflammatory cell types were enumerated in lung lavage from SFTPC-Muc5bTg mice subjected to a 3 wk (a) or 10 wk (b) bleomycin challenge and 2 wk P-2119 treatment (Tx) or saline vehicle (Veh) intervention protocol. Macrophages, lymphocytes, and neutrophils were significantly lower in P-2119 treated mice. Data are means  $\pm$  sem (n = 16 Veh and 17 Tx mice). Data were analyzed by Mann-Whitney tests.

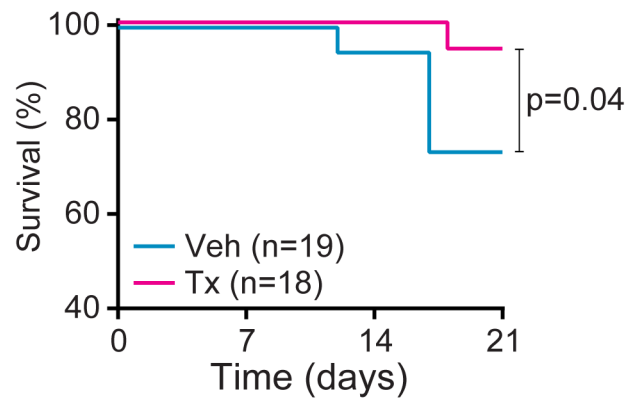

**Supplementary Figure 6. P-2119 treatment results in improved survival.** SFTPC-Muc5bTg mice were subjected to a 3 wk bleomycin challenge with a 2 wk P-2119 intervention protocol, with P-2119 or saline vehicle treatment starting 7 d post bleomycin challenge and ending 24 h prior to tissue harvest. Survival was improved in P-2119 treated SFTPC-Muc5b<sup>Tg</sup> mice. Kaplan-Meier survival results were analyzed for significant difference by  $\chi^2$  analysis.

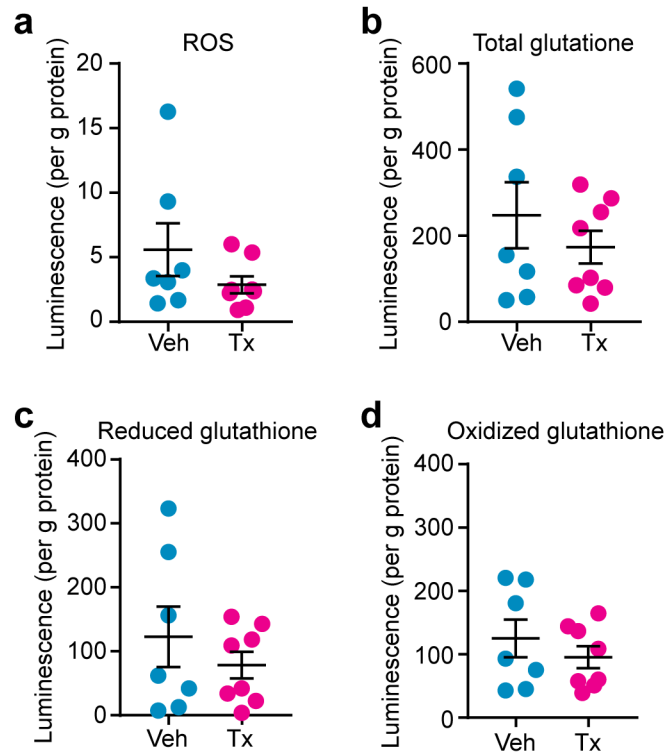

**Supplementary Figure 7. P-2119 treatment of mice treated with bleomycin (3 week model) does not affect redox balance.** (a) Reactive oxygen species (ROS) were assessed using ROS-GLO chemiluminescence assay in neat lung lavage obtained from mice exposed to saline vehicle (Veh) or P-2119 treatment (Tx). (b-d) A GSH-GLO chemiluminescence assay was used to assess total (b), reduced (c), and oxidized (d) glutathione. Data are means  $\pm$  sem (n = 7-8 mice per treatment group). Significance was assessed using a Mann-Whitney test.



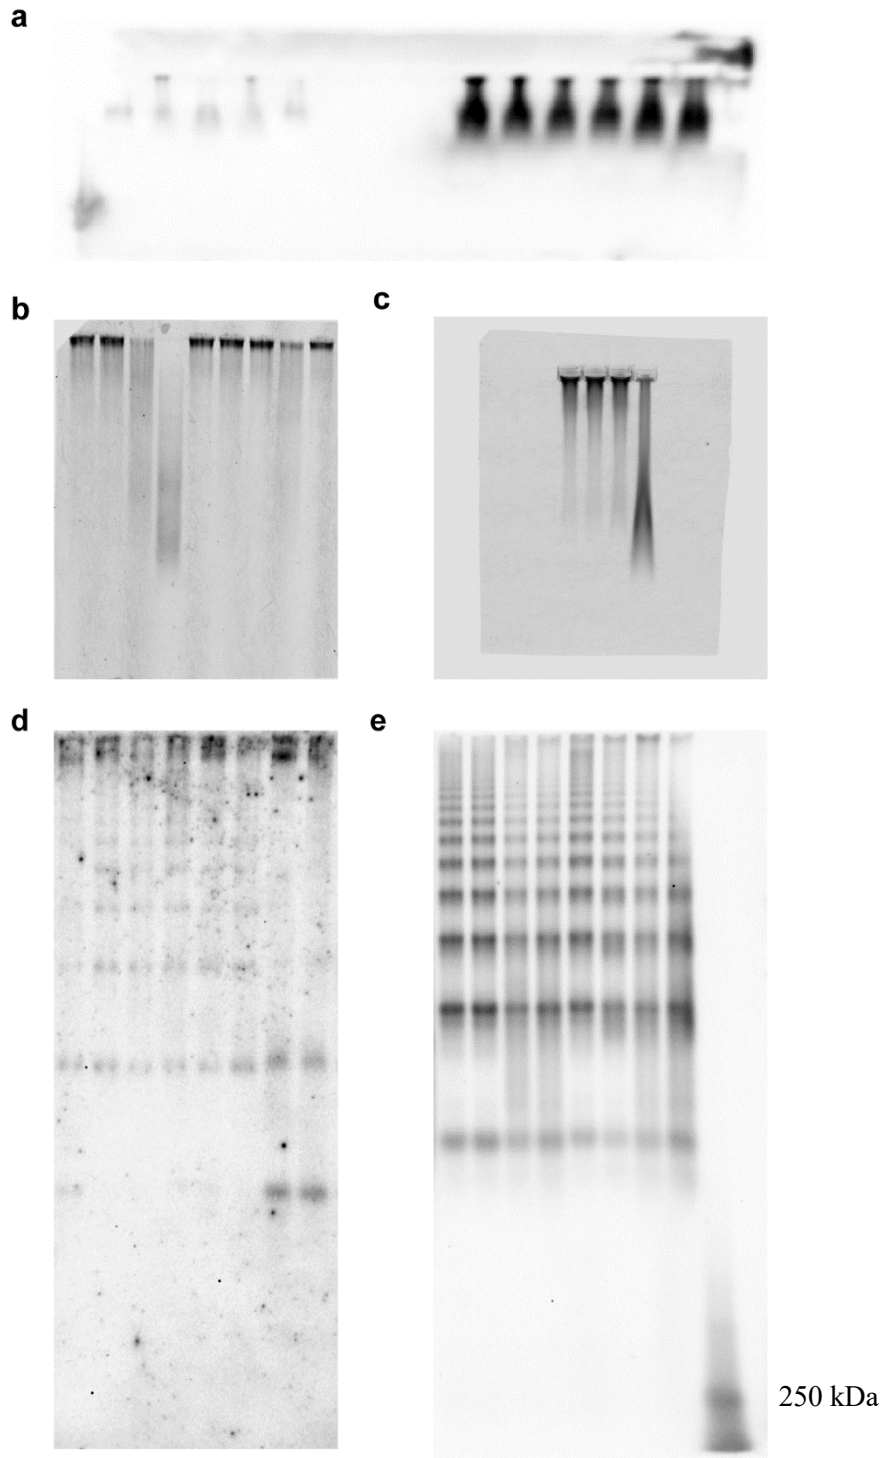

**Supplementary Figure 8. Original immunoblots.** Images from **Supplementary Figure 1b (a)**, **Figure 3c (b)**, **Figure 3d (c)**, **Figure 3h (d)**, and **Figure 3i (e)**. Secreted MUC5B/Muc5b monomers are >1 MDa. Rightmost lane in panel **e** is molecular weight ladder. In **a-d**, Molecular weight ladders were run to the end of gels and not transferred during vacuum blotting.

**Supplementary Table 1. Cytokine and chemokine levels bleomycin challenged mice.**

| Cytokine                      | Day 14 (1 week intervention) |                    |                   |      | Day 21 (2 weeks intervention) |                     |                   |      |
|-------------------------------|------------------------------|--------------------|-------------------|------|-------------------------------|---------------------|-------------------|------|
|                               | Untreated<br>(n = 8)         | Treated<br>(n = 9) | Treated<br>Fold Δ | p    | Untreated<br>(n = 16)         | Treated<br>(n = 16) | Treated<br>Fold Δ | p    |
| <b>IFN-γ</b>                  | 0.0 ± 0.0                    | 0.0 ± 0.0          | 1.2               | n.s. | 0.2 ± 0.1                     | 0.2 ± 0.0           | -1.3              | n.s. |
| <b>IL-1b</b>                  | 0.4 ± 0.1                    | 0.2 ± 0.0          | -1.5              | n.s. | 2.1 ± 0.9                     | 1.2 ± 0.5           | -1.8              | n.s. |
| <b>IL-2</b>                   | 0.4 ± 0.1                    | 0.5 ± 0.1          | 1.2               | n.s. | 2.5 ± 1.1                     | 1.4 ± 0.2           | -1.8              | n.s. |
| <b>IL-4</b>                   | 0.2 ± 0.0                    | 0.2 ± 0.0          | 1.4               | n.s. | 0.9 ± 0.3                     | 0.3 ± 0.1           | -2.9              | n.s. |
| <b>IL-5</b>                   | 1.6 ± 0.4                    | 1.6 ± 0.2          | 1.0               | n.s. | 8.5 ± 2.5                     | 10.2 ± 3.5          | 1.2               | n.s. |
| <b>IL-6 (x10<sup>3</sup>)</b> | 0.1 ± 4.7                    | .05 ± .02          | -1.9              | n.s. | 4.6 ± 2.3                     | 2.6 ± 1.3           | -1.7              | n.s. |
| <b>IL-9</b>                   | 2.1 ± 0.2                    | 2.4 ± 0.2          | 1.1               | n.s. | 4.0 ± 1.5                     | 2.4 ± 0.4           | -1.7              | n.s. |
| <b>IL-10</b>                  | 0.7 ± 0.1                    | 0.6 ± 0.1          | -1.1              | n.s. | 9.0 ± 4.2                     | 3.0 ± 0.6           | -3.0              | n.s. |
| <b>IL-12p70</b>               | 16.4 ± 2.7                   | 23.3 ± 1.8         | 1.4               | n.s. | 135.8 ± 59.5                  | 71.4 ± 23.6         | -1.9              | n.s. |
| <b>IL-15</b>                  | 5.0 ± 0.3                    | 6.6 ± 0.6          | 1.3               | 0.03 | 11.3 ± 1.5                    | 10.1 ± 1.3          | -1.1              | n.s. |
| <b>IL-17A</b>                 | 0.6 ± 0.1                    | 0.8 ± 0.1          | 1.2               | n.s. | 1.3 ± 0.2                     | 1.2 ± 0.1           | -1.1              | n.s. |
| <b>IL-30</b>                  | 2.0 ± 0.3                    | 2.0 ± 0.3          | 1.0               | n.s. | 4.8 ± 1.5                     | 3.0 ± 0.4           | -1.6              | n.s. |
| <b>IL-33</b>                  | 2.8 ± 0.3                    | 2.4 ± 0.3          | -1.2              | n.s. | 3.8 ± 0.3                     | 4.6 ± 0.5           | 1.2               | n.s. |
| <b>IP-10</b>                  | 12.0 ± 3.4                   | 7.9 ± 2.1          | -1.5              | n.s. | 24.5 ± 6.0                    | 42.6 ± 15.6         | 1.7               | n.s. |
| <b>KC</b>                     | 15.2 ± 2.6                   | 11.0 ± 2.1         | -1.4              | n.s. | 24.6 ± 6.4                    | 20.4 ± 3.3          | -1.2              | n.s. |
| <b>MCP-1</b>                  | 5.9 ± 1.5                    | 4.7 ± 0.6          | -1.3              | n.s. | 65.5 ± 25.8                   | 74.5 ± 27.8         | 1.1               | n.s. |
| <b>MIP-1α</b>                 | 2.6 ± 0.8                    | 2.3 ± 0.3          | -1.2              | n.s. | 2.1 ± 0.2                     | 2.3 ± 0.3           | 1.1               | n.s. |
| <b>MIP-2</b>                  | 14.6 ± 6.0                   | 9.9 ± 5.1          | -1.5              | n.s. | 7.6 ± 0.9                     | 6.3 ± 0.5           | -1.2              | n.s. |
| <b>TNF</b>                    | 20.5 ± 11.1                  | 11.8 ± 5.9         | -1.7              | n.s. | 7.8 ± 0.8                     | 7.6 ± 1.1           | 1.0               | n.s. |

P-2119 treatment of SFTPC-Muc5bTg mice treated with bleomycin (2.0 U/kg on day 0, and studied on day 14 for 1 week intervention model and day 21 for 2 week intervention models) does not affect chemokine and cytokine levels. Chemokines and cytokines in lung lavage fluid were assessed using a Mesoscale 19-plex electrochemiluminescence assay from mice exposed to saline (untreated) or P-2119 treatment (treated). Data are means ± sem in pg/ml of each analyte. Statistical significance was assessed using two-tailed Mann-Whitney tests with (significance cut-off,  $p < 0.05$ ).
